# Supplementary material for: Converging or Crossing Curves: Untie the Gordian Knot or Cut it? Appropriate Statistics for Non-Proportional Hazards in Decitabine DACO-016 Study (AML)
Source: Springer Nature journal article supplement (doi:10.1007/s12325-015-0238-9), 2015-09-01
Supplement: MOESM1 [file 9203560]

- *Why carry out this study?*
- Overall survival as the primary endpoint of the DAC-016 study was not met and decitabine was not approved by the FDA in acute myeloid leukemia (AML).
- Though pre-specified, the log-rank test could be considered not optimal to assess the observed survival difference because of the non-proportional hazard nature of the survival curves.
- Wilcoxon test is considered more powerful as it assigns more weight to earlier events. Wilcoxon test indicated significant increase in survival for decitabine versus treatment choice.
- *What was learned from the study?*
- It should be possible to ex-ante include different test options in a statistical analysis plan making their respective use dependent on the proportionality of hazard rates.
- In the future an adaptively-weighted log-rank test might be appropriate because it maintains optimality at the proportional alternatives, while improving the power over a wide range of non-proportional alternatives.

This summary slide represents the opinions of the authors. Sponsorship, article processing charges, and the open access charge for this study were funded by Janssen-Cilag GmbH, Germany. For a full list of acknowledgments and conflicts of interest for all authors of this article, please see the full text online. Copyright © The Author(s) 2015. Creative Commons Attribution Noncommercial License (CC BY-NC).
